# Supplementary material
Source: Springer Nature journal article supplement (https://www.springermedizin.de/resource/supplementary/12911_2012_605_MOESM2_ESM.pdf/9525860)
Supplement: MOESM2 [file 9525860]

Active:  Yes  No

Rule Number: 127

Reminder Group: ALL

Reminder Type: General

HM Concept: 4082

Suppress Actionable Reminder options:

Display Actionable Reminder options to all users:

Description:

Smoking - Current Smoker  
 The smoking reminders are displayed only to users in the "Smoking Cessation" super user group. They should not and are not associated with any reminder

(a) Reminder Maintenance

Available Coded Responses:

- Appointment scheduled
- Asthma action plan reviewed
- Asthma, COPD, CHF
- Both literature & wt. managem
- Chlamydia screen done today
- Chlamydia screening doen by
- Contraindicated
- Cost of Treatment
- Currently seeing rheumatolog
- Done Elsewhere

Add Coded Response(s) Remove from table

| Coded Response                                                                | Time | Unit    | Snooze Period |
|-------------------------------------------------------------------------------|------|---------|---------------|
| <input type="checkbox"/> Done/Scheduled Today                                 | 1    | Day(s)  | Day(s)        |
| <input type="checkbox"/> Both literature & wt. management counseling provided | 1    | Year(s) | Year(s)       |
| <input type="checkbox"/> Pt education material distributed                    | 1    | Year(s) | Year(s)       |
| <input type="checkbox"/> Pt is not obese                                      | 1    | Year(s) | Year(s)       |
| <input type="checkbox"/> Referred to Nutritionist for counseling              | 1    | Year(s) | Year(s)       |

(b) Coded Responses

Action Types:

- Med Alternatives Lookup
- Open LMR Module
- Open Note Template
- Open Radiology App

Add Action(s) Remove from table

|                                     | Action Type     | Label            | Display Order | Relevant ID           | Coded Response       |
|-------------------------------------|-----------------|------------------|---------------|-----------------------|----------------------|
| <input checked="" type="checkbox"/> | Open LMR Module | Order Medication | 1             | LMR Button MEDICATION | Done/Scheduled Today |

(c) Actions
